# Supplementary material for: Acceptability of risk stratification within population‐based cancer screening from the perspective of the general public: A mixed‐methods systematic review
Source: PubMed Central journal article supplement (PMC10154794; doi:10.1111/hex.13739), 2023-02-28
Supplement: HEX-26--s002.pdf [file HEX-26--s002.pdf]

MEDLINE search:

|                                                              |         |
|--------------------------------------------------------------|---------|
| 1. "risk stratifi*".ti,ab.                                   | 36564   |
| 2. "risk test*".ti,ab.                                       | 506     |
| 3. "risk predict*".ti,ab.                                    | 14348   |
| 4. "risk assess*".ti,ab.                                     | 74952   |
| 5. personali#ed.ti,ab.                                       | 54951   |
| 6. "risk based".ti,ab.                                       | 7194    |
| 7. Risk Assessment/                                          | 290788  |
| 8. 1 or 2 or 3 or 4 or 5 or 6 or 7                           | 422416  |
| 9. oncology.ti,ab.                                           | 105225  |
| 10. cancer*.ti,ab.                                           | 1958861 |
| 11. neoplas*.ti,ab.                                          | 276484  |
| 12. tumo#r.ti,ab.                                            | 222621  |
| 13. Neoplasms/                                               | 455891  |
| 14. 9 or 10 or 11 or 12 or 13                                | 2491073 |
| 15. screen*.ti,ab.                                           | 837314  |
| 16. prevent*.ti,ab.                                          | 1550634 |
| 17. Mass Screening/                                          | 110620  |
| 18. 15 or 16 or 17                                           | 2333512 |
| 19. acceptab*.ti,ab.                                         | 199611  |
| 20. perspective*.ti,ab.                                      | 370012  |
| 21. opinion*.ti,ab.                                          | 114818  |
| 22. view*.ti,ab.                                             | 506389  |
| 23. attitude*.ti,ab.                                         | 165230  |
| 24. perception*.ti,ab.                                       | 281908  |
| 25. feedback.ti,ab.                                          | 151316  |
| 26. evaluat*.ti,ab.                                          | 3884042 |
| 27. Attitude/                                                | 50137   |
| 28. Feedback/                                                | 31319   |
| 29. 19 or 20 or 21 or 22 or 23 or 24 or 25 or 26 or 27 or 28 | 5227806 |
| 30. 8 and 14 and 18 and 29                                   | 4782    |
